# Supplementary material
Source: publisher figshare collection journal article supplement (https://acs.figshare.com/ndownloader/files/12179387)
Supplement: Supplementary file 1 [file 12179387]

**Supporting Information**

**Sterol 14*α*-Demethylase Structure-Based Design of VNI ((*R*)-*N*-(1-(2,4-dichlorophenyl)-2-(1*H*-imidazol-1-yl)ethyl)-4-(5-phenyl-1,3,4-oxadiazol-2-yl)benzamide)) Derivatives to Target Fungal Infections: Synthesis, Biological Evaluation, and Crystallographic Analysis**

Laura Friggeri,† Tatiana Y. Hargrove,† Zdzislaw Wawrzak,§ Anna L. Blobaum,¥ Girish Rachakonda, *ŧ* Craig W. Lindsley,¥ Fernando Villalta,ŧ W. David Nes,ǂ Maurizio Botta,# F. Peter Guengerich†, and Galina I. Lepesheva*†, ‡

**Contents of Supporting Information**

Supplementary Tables

Table S1. Data collection and refinement statistics

Supplementary Figures

Fig S1. Structural formulas of systemic antifungal agents.

Fig S2. Apparent ligand binding affinity vs. inhibition of enzymatic activity.

Fig. S3. Gatekeeping interactions of LFV in complexes A and B.

Fig. S4. 1H NMR spectra.

Fig. S5. HRMS spectra.

Fig S6. HPLC chromatograms.

| Complex | *A. fumigatus* CYP51- LFV  (compound **3**) |
| --- | --- |
| **Data collection** |  |
| Wavelength, Å | 0.9787 |
| Space group | P31 |
| Cell dimensions |  |
| a, b, c, Å | 108.438 108.438 90.999 |
| α, β, γ, ° | 90.00, 90.00, 120.00 |
| Molecules per asymmetric unit | 2 |
| Number of reflections | 56424 |
| Resolution (outer shell), Å | 30.00 -2.38 (2.44-2.38) |
| Rmerge (outer shell) | 0.039 (1.01) |
| I/σ (outer shell) | 27.1 (1.7) |
| Completeness (outer shell), % | 96.9 (69.4) |
| Redundancy (outer shell) | 4.9 (4.9) |
| **Refinement** |  |
| R-work | 0.215 |
| R-free | 0.230 |
| Rms deviations from ideal geometry |  |
| Bond lengths, Å | 0.001 |
| Bond angles, ° | 1.11 |
| Ramachandran plot |  |
| Residues in favorable/allowed regions, % | 98.0/99.8 |
| Outliers, %  Wilson B-factor, Å | 0.2  30.1 |
| Number of atoms (mean B-factor, Å2) | 7762 (40.4) |
| Number of residues per molecule | A/B |
| Protein (mean B-factor, Å2) | 468/468 (42.8/39.4) |
| Heme (mean B-factor, Å2) | 1/1 (23.9/19.1) |
| Ligand (mean B-factor, Å2)  Water ( mean B-factor, Å2) | **1/1** (54.3/58.8)  106 (41.3) |
| **PDB code** | **6CR2** |

**Table S1. Data collection and refinement statistics**

**Fig S1. Structural formulas of systemic antifungal agents. A**. Clinically used azole drugs. **B**. Azole-based drug candidates in clinical trials. **C**. Other clinically used antifungal drugs.

**Fig S2. Apparent ligand binding affinity vs. inhibition of enzymatic activity.** Percent of inhibition was calculated in a 1 hour reaction at the enzyme/inhibitor molar ratio 1:1.5, and the *K*d values were calculated using spectral titration as described in Experimental Procedures.

**Fig. S3. Gatekeeping interactions of LFV in complexes A and B.** In complex B LFV forms H-bond like interactions with the FG arm of *A. fumigatus* CYP51, while in complex A no such interaction is observed, and the minimal distance to the FG arm is 6.9 Å

**Fig. 4**. 1H NMR (CDCl3, 400MHz) spectra.

**Fig. S5.** HRMS spectra.

**Fig. S6.** HPLC chromatograms.
